# Supplementary material for: Classifying Free Texts Into Predefined Sections Using AI in Regulatory Documents: A Case Study with Drug Labeling Documents
Source: PubMed Central journal article supplement — Chem Res Toxicol. 2023 Jul 24;36(8):1290–9. doi: 10.1021/acs.chemrestox.3c00028 (PMC10445280; doi:10.1021/acs.chemrestox.3c00028), 2023-07-24
Supplement: tx3c00028_si_001.pdf [file tx3c00028_si_001.pdf]

# Supporting Information

## Classifying Free Texts into Pre-Defined Sections Using AI in Regulatory Documents: A Case Study with Drug Labeling Documents

Magnus Gray<sup>1</sup>, Joshua Xu<sup>1</sup>, Weida Tong<sup>1</sup>, Leihong Wu<sup>1\*</sup>

*<sup>1</sup>Division of Bioinformatics & Biostatistics, National Center for Toxicological Research, US Food and Drug Administration, 3900 NCTR Rd., Jefferson, AR 72079 USA*

\*Corresponding Author:

Leihong Wu, Division of Bioinformatics & Biostatistics, National Center for Toxicological Research, US Food and Drug Administration, 3900 NCTR Rd., Jefferson, AR 72079 USA

Email: [Leihong.Wu@fda.hhs.gov](mailto:Leihong.Wu@fda.hhs.gov)

### Table of Contents

|                                                               |    |
|---------------------------------------------------------------|----|
| Non-PLR & SmPC Shapley Additive Explanation Analysis .....    | S2 |
| Figure S1: Non-PLR Format Shapley Additive Explanations ..... | S2 |
| Figure S2: SmPC Format Shapley Additive Explanations .....    | S3 |

## Non-PLR & SmPC Shapley Additive Explanation Analysis

The two collections of charts below (*Figure S1* and *Figure S2*) document words which were the most influential in the four major categories in Non-PLR and SmPC drug labeling formats, respectively. While many of the selected tokens varied greatly between the three formats of drug labeling documents (i.e., PLR, Non-PLR, and SmPC), several patterns were noted. For instance, regarding the “Indications & Usage” section, each format was heavily influenced by the word “Indicated;” and in the “Warnings & Precautions” section, each classification was largely influenced by the term “Monitor.” Thus, this Shapley Additive Explanation analysis showed that, while the three formats were fundamentally different, many of the same or similar-meaning words influenced the models’ decisions when predicting the section endpoint for a given drug labeling sentence.

**Figure S1: Non-PLR Format Shapley Additive Explanations**

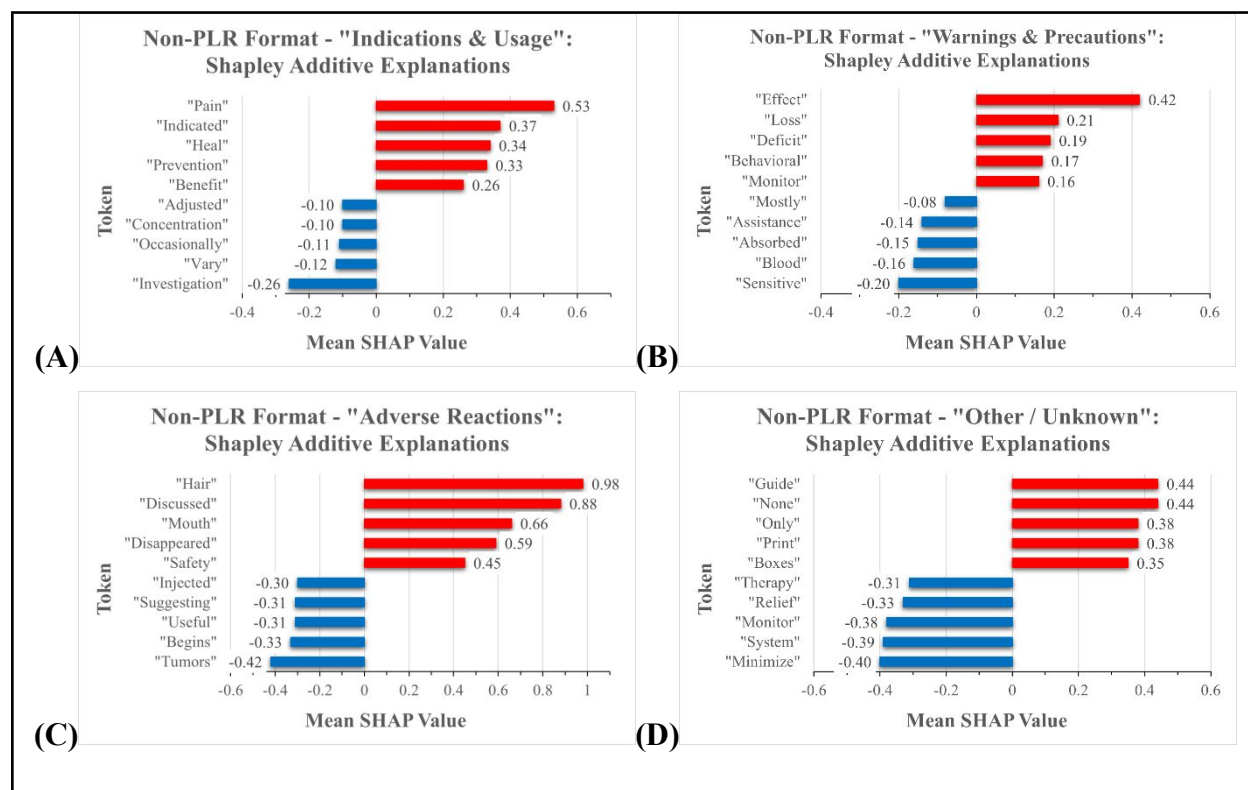

*Figure S1: Non-PLR Format Shapley Additive Explanations. (A) Indications & Usage. (B) Warnings & Precautions. (C) Adverse Reactions. (D) Other/Unknown.*

**Figure S2: SmPC Format Shapley Additive Explanations**

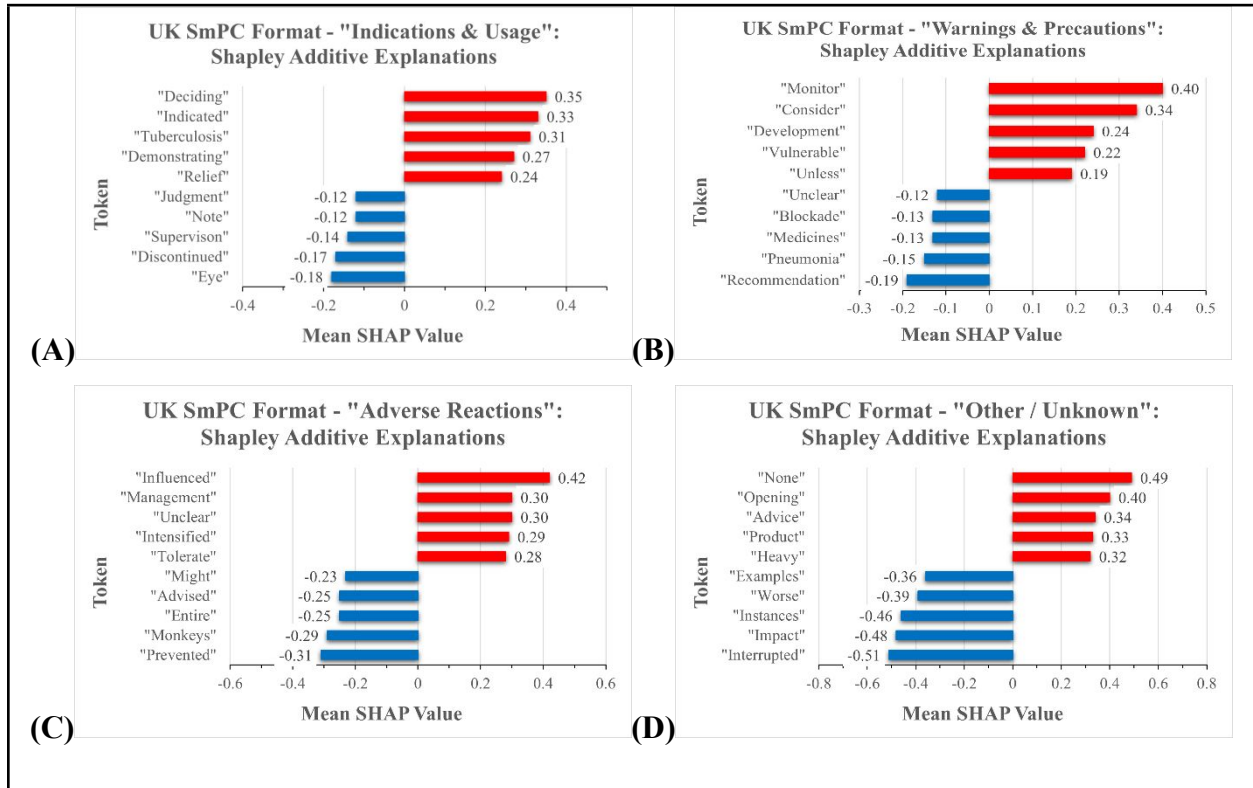

*Figure S2: SmPC Format Shapley Additive Explanations. (A) Indications & Usage. (B) Warnings & Precautions. (C) Adverse Reactions. (D) Other/Unknown.*
